# Supplementary material for: Disparity in Access to Oncology Precision Care: A Geospatial Analysis of Driving Distances to Genetic Counselors in the U.S.
Source: Frontiers journal article supplement (doi:10.3389/fonc.2021.689927), 2021-06-16
Supplement: Table_4.pdf [file Table_4.pdf]

**Table 4. Median and IQR of access to care for *BRCA*-associated cancer types in different U.S. regions**

| Region    | Cancer type | Median of access/ mins | IQR of access /mins |
|-----------|-------------|------------------------|---------------------|
| Midwest   | Breast      | 54.1                   | 44.9                |
|           | Ovary       | 34.1                   | 14.7                |
|           | Pancreas    | 47.8                   | 16.3                |
|           | Prostate    | 54.3                   | 37.1                |
| Northeast | Breast      | 30.8                   | 21.2                |
|           | Ovary       | 30.0                   | 21.6                |
|           | Pancreas    | 30.7                   | 21.4                |
|           | Prostate    | 31.0                   | 22.2                |
| South     | Breast      | 52.0                   | 28.2                |
|           | Ovary       | 35.9                   | 18.4                |
|           | Pancreas    | 49.8                   | 23.5                |
|           | Prostate    | 53.2                   | 27.5                |
| West      | Breast      | 74.8                   | 48.9                |
|           | Ovary       | 41.1                   | 50.2                |
|           | Pancreas    | 56.7                   | 39.2                |
|           | Prostate    | 70.8                   | 55.2                |
